# Supplementary material for: Distribution and Characterisation of Tick-Borne Flavi-, Flavi-like, and Phenuiviruses in the Chelyabinsk Region of Russia
Source: MDPI journal article supplement (doi:10.3390/v14122699), 2022-12-01
Supplement: s1 [file s1]

**Table S1.** Locations of tick collection

| Latitude  | Longitude | Date<br>(mm.year) | Tick species                   |                              |                                |                               | Collection<br>method |
|-----------|-----------|-------------------|--------------------------------|------------------------------|--------------------------------|-------------------------------|----------------------|
|           |           |                   | <i>I. persulcatus</i><br>(♂+♀) | <i>I. persulcatus.</i><br>NN | <i>D. reticulatus</i><br>(♂+♀) | <i>D. marginatus</i><br>(♂+♀) |                      |
| 54.083520 | 59.546226 | 05.2014           | 2+1                            |                              | 9+8                            | 2+10                          | FV                   |
| 54.077678 | 59.557866 | 05.2014           |                                |                              | 0+3                            | 0+2                           | FV                   |
| 54.055812 | 59.605618 | 05.2014           | 1+7                            |                              | 0+2                            | 5+12                          | FV                   |
| 54.048115 | 59.662730 | 05.2014           |                                |                              |                                | 9+15                          | FV                   |
| 54.133282 | 59.531905 | 05.2014           | 1+0                            |                              |                                | 1+7                           | FV                   |
| 54.116667 | 59.533333 | 05.2014           | 1+0                            |                              |                                |                               | FV                   |
| 54.124452 | 59.546685 | 05.2014           | 29+30                          |                              | 0+5                            | 6+3                           | FV                   |
| 53.874638 | 59.229960 | 05.2014           |                                |                              | 5+4                            | 30+30                         | RA                   |
| 53.855183 | 59.240433 | 05.2014           |                                |                              | 22+36                          | 33+55                         | FV                   |
| 53.880754 | 59.241434 | 05.2014           |                                |                              |                                | 24+48                         | RA                   |
| 53.857781 | 59.242444 | 05.2014           |                                |                              | 0+3                            | 2+2                           | FV                   |
| 53.881783 | 59.1628   | 05.2014           |                                |                              | 50+106                         | 18+33                         | FV                   |
| 53.881103 | 59.163164 | 05.2014           |                                |                              | 21+45                          | 1+2                           | FV                   |
| 54.131565 | 59.541217 | 05.2014           | 15+8                           |                              |                                | 0+1                           | FV                   |
| 53.674117 | 59.731317 | 05.2014           |                                |                              | 3+1                            | 21+25                         | FV                   |
| 53.599617 | 59.82275  | 05.2014           |                                |                              |                                | 0+2                           | FV                   |
| 53.524360 | 59.799737 | 05.2014           |                                |                              |                                | 9+27                          | RA                   |
| 53.5159   | 59.775067 | 05.2014           |                                |                              | 2+0                            | 38+63                         | FV                   |
| 53.382567 | 59.9295   | 05.2014           | 0+1                            |                              | 3+8                            | 17+22                         | FV                   |
| 53.3565   | 60.377167 | 05.2014           |                                |                              |                                | 2+3                           | RA                   |
| 52.885633 | 60.051833 | 05.2014           | 1+1                            |                              | 41+84                          | 34+78                         | FV                   |
| 52.940933 | 59.935533 | 05.2014           |                                |                              | 4+3                            |                               | FV                   |
| 52.053183 | 59.957667 | 05.2014           |                                |                              | 3+3                            | 39+91                         | FV                   |
| 53.124567 | 59.896933 | 05.2014           |                                |                              | 2+3                            | 1+2                           | FV                   |
| 53.14555  | 59.935283 | 05.2014           | 4+0                            |                              | 5+4                            | 0+2                           | FV                   |
| 53.315983 | 60.1329   | 05.2014           |                                |                              | 1+0                            |                               | FV                   |
| 53.233183 | 60.535117 | 05.2014           | 0+1                            |                              | 2+5                            | 0+1                           | FV                   |
| 52.82475  | 60.5678   | 05.2014           |                                |                              |                                | 0+2                           | FV                   |
| 52.428583 | 60.306967 | 05.2014           |                                |                              |                                | 0+1                           | FV                   |
| 52.49865  | 60.14015  | 05.2014           |                                |                              |                                | 5+1                           | RA                   |
| 52.497667 | 60.00035  | 05.2014           |                                |                              | 11+10                          | 10+20                         | FV                   |
| 52.47595  | 59.871383 | 05.2014           |                                |                              | 1+13                           | 1+5                           | FV                   |
| 52.459233 | 60.249483 | 05.2014           |                                |                              | 1+2                            | 22+31                         | FV                   |
| 52.541683 | 60.394067 | 05.2014           |                                |                              | 0+1                            |                               | FV                   |
| 54.446533 | 60.79435  | 05.2014           |                                |                              |                                | 3+3                           | FV                   |
| 54.629017 | 60.650567 | 05.2014           | 1+1                            |                              |                                | 0+3                           | FV                   |
| 55.128629 | 60.072396 | 05.2014           | 19+24                          |                              |                                |                               | FV                   |
| 55.02145  | 60.168283 | 05.2014           | 75+78                          | 13                           |                                |                               | FV                   |
| 54.410216 | 62.698490 | 05.2014           |                                |                              | 21+38                          | 11+16                         | FV                   |
| 53.24225  | 60.473233 | 05.2015           |                                |                              | 0+1                            | 0+1                           | FV                   |
| 53.266383 | 60.461617 | 05.2015           |                                |                              | 2+6                            | 6+23                          | FV                   |
| 53.214733 | 60.572467 | 05.2015           |                                |                              | 0+2                            | 2+4                           | FV                   |
| 52.945    | 60.86385  | 05.2015           |                                |                              |                                | 3+16                          | FV                   |
| 52.918083 | 60.847017 | 05.2015           |                                |                              |                                | 4+6                           | FV                   |
| 52.427433 | 60.307167 | 05.2015           |                                |                              |                                | 0+1                           | FV                   |
| 52.452917 | 60.26015  | 05.2015           |                                |                              | 1+2                            | 2+8                           | FV                   |
| 52.468017 | 60.226217 | 05.2015           |                                |                              | 34+68                          | 9+15                          | FV                   |

|               |           |         |                |           |                |                |           |
|---------------|-----------|---------|----------------|-----------|----------------|----------------|-----------|
| 52.494667     | 60.011817 | 05.2015 |                |           | 4+10           | 8+19           | FV        |
| 52.970983     | 60.604833 | 05.2015 |                |           | 3+12           | 8+8            | FV        |
| 53.066141     | 60.660224 | 05.2015 |                |           |                | 0+1            | FV        |
| 53.067168     | 60.669646 | 05.2015 |                |           |                | 7+8            | RA        |
| 53.5737       | 60.764017 | 05.2015 | 1+1            |           | 2+21           | 4+7            | FV        |
| 53.719583     | 60.727567 | 05.2015 |                |           | 6+48           | 60+111         | FV        |
| 54.44595      | 60.70385  | 05.2015 | 8+6            |           | 0+3            | 0+2            | FV        |
| 54.441733     | 60.71415  | 05.2015 | 0+3            |           | 6+13           | 6+6            | FV        |
| 54.451733     | 60.751667 | 05.2015 | 1+1            |           | 6+14           | 5+4            | FV        |
| 54.435233     | 60.788817 | 05.2015 |                |           | 0+2            |                | FV        |
| 54.39845      | 60.783167 | 05.2015 |                |           | 41+89          | 4+11           | FV        |
| 54.569117     | 60.288267 | 05.2015 |                |           | 7+15           | 43+75          | FV        |
| 54.568483     | 60.284117 | 05.2015 | 0+1            |           | 12+17          | 7+11           | FV        |
| 54.527867     | 60.334233 | 05.2015 | 1+3            |           | 2+3            | 15+46          | FV        |
| 54.54835      | 59.947367 | 05.2015 |                |           | 7+10           | 29+49          | FV        |
| 54.577033     | 59.966133 | 05.2015 | 4+3            |           |                | 1+5            | FV        |
| 55.153347     | 59.698556 | 05.2015 | 0+1            |           |                |                | FV        |
| 55.209033     | 59.571467 | 05.2015 | 71+62          |           |                |                | FV        |
| 55.22005      | 59.56005  | 05.2015 | 77+77          |           |                |                | FV        |
| 55.021583     | 60.169783 | 05.2015 | 30+42          | 5         |                |                | FV        |
| 55.01885      | 60.165117 | 05.2015 | 6+5            |           |                |                | FV        |
| 55.362883     | 59.556017 | 05.2015 | 6+3            |           |                |                | FV        |
| 55.357683     | 59.51585  | 05.2015 | 21+25          |           |                |                | FV        |
| 55.791433     | 60.617467 | 05.2015 | 7+4            |           |                |                | FV        |
| 56.008567     | 60.524933 | 05.2015 | 5+10           |           |                |                | FV        |
| 56.0172       | 60.5847   | 05.2015 | 30+26          |           |                |                | FV        |
| 55.969983     | 60.632067 | 05.2015 | 12+9           |           |                |                | FV        |
| 55.900983     | 60.7282   | 05.2015 | 2+1            |           |                |                | FV        |
| 55.891833     | 60.693683 | 05.2015 | 26+18          |           |                |                | FV        |
| 55.89465      | 60.695333 | 05.2015 | 29+29          |           |                |                | FV        |
| 56.161217     | 60.474183 | 05.2015 | 17+24          |           |                |                | FV        |
| 56.167933     | 60.4683   | 05.2015 | 25+33          | 1         |                |                | FV        |
| 56.168967     | 60.471233 | 05.2015 | 40+47          | 3         |                |                | FV        |
| 56.2076       | 60.443033 | 05.2015 | 46+53          |           |                |                | FV        |
| <b>Total:</b> |           |         | <b>614+639</b> | <b>22</b> | <b>335+719</b> | <b>490+953</b> | <b>FV</b> |
|               |           |         |                |           | <b>5+4</b>     | <b>77+102</b>  | <b>RA</b> |

Grey color – ticks described in previous article [1]

**RA** – removed from animal, **FV** – flagging vegetation

♂ - adult male, ♀ - adult female, NN - nymphs

**Table S2.** Specific primers for amplification and sequencing of the segment 2 of the Yanggou tick virus genome.

| Name of the primer            | Nucleotide sequence (5′ – 3′)  | Primer direction | Genome locus | Amplicon size, bp | Temperature , °C | Reference  |
|-------------------------------|--------------------------------|------------------|--------------|-------------------|------------------|------------|
| Yanggou tick virus            |                                |                  |              |                   |                  |            |
| Yanggou_gly_1F                | ACTACTGGTTGCCGTCCTCG           | forward          | segment 2    | 305               | 52               | this study |
| Yanggou_gly_1R                | GTCGCTGCAGTCAAATATCT           | reverse          |              |                   |                  |            |
| Yanggou_seg2_1F               | GACAGAATCCAAAGACGACAC          | forward          | segment 2    | 791               | 50               |            |
| Yanggou_seg2_1R               | CACACTGTCCCGTTCATCCA           | reverse          |              |                   |                  |            |
| Yanggou_seg2_2F               | TGACAAACCAGATGCGGGAA           | forward          | segment 2    | 1184              | 52               |            |
| Yanggou_seg2_2R               | GCAGCAAGTTGGAGAATGCC           | reverse          |              |                   |                  |            |
| Yanggou_seg2_4F               | GGATGGGGTGGTCAGAGTC            | forward          | segment 2    | 869               | 52               |            |
| Yanggou_seg2_4R               | GTTAATCCGGGCGTCATCT            | reverse          |              |                   |                  |            |
| Alongshan virus               |                                |                  |              |                   |                  |            |
| Miass_gly_3F                  | TGGATCAGCTCACACCACAC           | forward          | segment 2    | 333               | 53               | [2]        |
| Miass_gly_3R                  | TCACCGTCACAGTGGAAATGG          | reverse          |              |                   |                  |            |
| Tick-borne encephalitis virus |                                |                  |              |                   |                  |            |
| Kgg31                         | AAAGGCAGCATTGTGACCTG           | forward          | E protein    | 361               | 52               | [3]        |
| Kgg19                         | CGTGTCTCCACGGCAGAGCC           | reverse          |              |                   |                  |            |
| Kgg65                         | AGATTTTCTTGACGT                | forward          | 5′ NTR       | 1100              | 50               | [4]        |
| TBE1095r                      | G(C/a)GTCAAGCCACACATCC         | reverse          | E protein    |                   |                  |            |
| Kgg35                         | CTGACCGTGGAAGTGTGG             | forward          | M protein    | 1500              | 55               |            |
| Kgg26                         | AAGCTCATGGACATGGTAGG           | reverse          | E protein    |                   |                  |            |
| Kgg16                         | AGGGGAGCAGCATTGGAAG            | forward          | E protein    | 1200              | 55               |            |
| Kgg30                         | TGGTGCTCCTCACAGAAGC            | reverse          | NS1 protein  |                   |                  |            |
| MAMD                          | AACATGATGGGRAARAGRGA<br>RAA    | forward          | NS5 protein  | 250               | 50               | [5]        |
| cFD2                          | GTGTCCCAGCCGGCGGTGTC<br>ATCAGC | reverse          |              |                   |                  |            |
| Phenuiviruses                 |                                |                  |              |                   |                  |            |
| PhlP2                         | GGCTACTTCAARAAYAARGA<br>NGA    | forward          | L segment    | 507               | 50               | [6]        |
| PhlM2                         | CTCTCTCAGICCCICCRTGYTG         | reverse          |              |                   |                  |            |

**Table S3.** Percent identity of the complete nucleotide and amino acid sequences of protein E of the three TBEV strains. Genbank accession numbers for each strain are as follows: strain Kusa15-T22532 (OM056525), strain Zlatoust15-T22637 (OM056526), strain Zlatoust15-T22241 (OM056527).

| Strain            | Nucleotide identity, % |                   | Amino acid identity, % |                   |
|-------------------|------------------------|-------------------|------------------------|-------------------|
|                   | Zlatoust15-T22637      | Zlatoust15-T22241 | Zlatoust15-T22637      | Zlatoust15-T22241 |
| Kusa15-T22532     | 99.12                  | 96.31             | 99.6                   | 99.4              |
| Zlatoust15-T22637 |                        | 96.81             |                        | 99.4              |

**Table S4.** Percent identity of the nucleotide sequences of the protein VP1a of 16 strains of the Alongshan virus. GenBank accession numbers for each strain are presented in the table.

| Strain_GenBank accession number | Kuutsalo-23_MN107154 | Haapasaari-18_MN107158 | JMTV/I.ricinus/France_MN095520 | Rowan19-T32778_MW525310 | Kursh18-T30290_MW525309 | Kursh18-T30284_MW525306 | Ulya15-T22688_MW525312 | Tat14-T21924_MW525313 | Goms13-T17158_MW525287 | Galozero14-T20426_MN604229 | Miass519_MN648776 | Miass506_MW525319 | H3_MH158416 | Erjey17-T25134_MW525295 | Miass527_MN648772 |
|---------------------------------|----------------------|------------------------|--------------------------------|-------------------------|-------------------------|-------------------------|------------------------|-----------------------|------------------------|----------------------------|-------------------|-------------------|-------------|-------------------------|-------------------|
| Haapasaari-18_MN107158          | 98.53                |                        |                                |                         |                         |                         |                        |                       |                        |                            |                   |                   |             |                         |                   |
| JMTV/I.ricinus/France_MN095520  | 98.67                | 99.02                  |                                |                         |                         |                         |                        |                       |                        |                            |                   |                   |             |                         |                   |
| Rowan19-T32778_MW525310         | 98.88                | 98.95                  | 99.09                          |                         |                         |                         |                        |                       |                        |                            |                   |                   |             |                         |                   |
| Kursh18-T30290_MW525309         | 99.09                | 99.16                  | 99.30                          | 99.65                   |                         |                         |                        |                       |                        |                            |                   |                   |             |                         |                   |
| Kursh18-T30284_MW525306         | 97.38                | 97.60                  | 98.03                          | 97.96                   | 97.89                   |                         |                        |                       |                        |                            |                   |                   |             |                         |                   |
| Ulya15-T22688_MW525312          | 95.76                | 95.69                  | 95.99                          | 95.91                   | 95.99                   | 95.91                   |                        |                       |                        |                            |                   |                   |             |                         |                   |
| Tat14-T21924_MW525313           | 95.98                | 95.91                  | 96.06                          | 96.13                   | 96.21                   | 95.99                   | 99.09                  |                       |                        |                            |                   |                   |             |                         |                   |
| Goms13-T17158_MW525287          | 92.99                | 92.99                  | 93.69                          | 93.31                   | 93.07                   | 93.77                   | 93.24                  | 92.69                 |                        |                            |                   |                   |             |                         |                   |
| Galozero14-T20426_MN604229      | 93.61                | 93.84                  | 94.16                          | 93.93                   | 93.69                   | 93.93                   | 93.78                  | 93.70                 | 95.69                  |                            |                   |                   |             |                         |                   |
| Miass519_MN648776               | 93.54                | 94.24                  | 94.55                          | 94.32                   | 94.09                   | 94.62                   | 93.63                  | 93.55                 | 95.84                  | 96.06                      |                   |                   |             |                         |                   |
| Miass506_MW525319               | 93.54                | 94.24                  | 94.55                          | 94.32                   | 94.09                   | 94.62                   | 93.63                  | 93.55                 | 95.84                  | 96.06                      | 100.00            |                   |             |                         |                   |
| H3_MH158416                     | 91.27                | 91.44                  | 91.77                          | 91.69                   | 91.45                   | 92.33                   | 91.78                  | 91.70                 | 91.71                  | 92.50                      | 92.89             | 92.89             |             |                         |                   |
| Erjey17-T25134_MW525295         | 92.32                | 92.49                  | 93.12                          | 93.05                   | 92.81                   | 93.06                   | 92.74                  | 92.82                 | 92.99                  | 93.29                      | 93.83             | 93.83             | 94.91       |                         |                   |
| Miass527_MN648772               | 92.48                | 92.65                  | 93.28                          | 93.36                   | 93.13                   | 92.91                   | 92.90                  | 92.66                 | 92.98                  | 92.98                      | 93.37             | 93.37             | 94.76       | 98.74                   |                   |
| Miass502_MW525315               | 92.65                | 92.66                  | 93.29                          | 93.37                   | 93.13                   | 93.07                   | 93.06                  | 92.82                 | 93.30                  | 93.15                      | 93.53             | 93.53             | 94.91       | 98.74                   | 99.72             |

Analyses were conducted using the Maximum Composite Likelihood model [7]. This analysis involved 16 nucleotide sequences. Codon positions included were 1st+2nd+3rd+Noncoding. All positions containing gaps and missing data were eliminated (complete deletion option). There were a total of 1446 positions in the final dataset. Evolutionary analyses were conducted in MEGA X [8]. Colour indicates from what tick species the strain was isolated: green – *Ixodes ricinus*, red – *Ixodes persulcatus*.

**Table S5.** Percent identity of the amino acid sequences of the protein VP1a of 16 strains of the Alongshan virus. GenBank accession numbers for each strain are presented in the table.

| Strain_GenBank accession number | Kuutsalo-23_MN107154 | Haapasaari-18_MN107158 | JMTV/I.ricinus/France_MN095520 | Rowan19-T32778_MW525310 | Kursh18-T30290_MW525309 | Kursh18-T30284_MW525306 | Ulya15-T22688_MW525312 | Tat14-T21924_MW525313 | Goms13-T17158_MW525287 | Galozero14-T20426_MN604229 | Mias519_MN648776 | Mias506_MW525319 | H3_MH158416 | Erjey17-T25134_MW525295 | Mias527_MN648772 |
|---------------------------------|----------------------|------------------------|--------------------------------|-------------------------|-------------------------|-------------------------|------------------------|-----------------------|------------------------|----------------------------|------------------|------------------|-------------|-------------------------|------------------|
| Haapasaari-18_MN107158          | 99.16                |                        |                                |                         |                         |                         |                        |                       |                        |                            |                  |                  |             |                         |                  |
| JMTV/I.ricinus/France_MN095520  | 99.37                | 99.37                  |                                |                         |                         |                         |                        |                       |                        |                            |                  |                  |             |                         |                  |
| Rowan19-T32778_MW525310         | 98.96                | 98.96                  | 99.58                          |                         |                         |                         |                        |                       |                        |                            |                  |                  |             |                         |                  |
| Kursh18-T30290_MW525309         | 99.37                | 99.37                  | 100.00                         | 99.58                   |                         |                         |                        |                       |                        |                            |                  |                  |             |                         |                  |
| Kursh18-T30284_MW525306         | 97.90                | 97.90                  | 98.53                          | 98.53                   | 98.53                   |                         |                        |                       |                        |                            |                  |                  |             |                         |                  |
| Ulya15-T22688_MW525312          | 96.19                | 96.62                  | 96.40                          | 96.40                   | 96.40                   | 96.62                   |                        |                       |                        |                            |                  |                  |             |                         |                  |
| Tat14-T21924_MW525313           | 96.19                | 96.62                  | 96.40                          | 96.40                   | 96.40                   | 96.62                   | 99.58                  |                       |                        |                            |                  |                  |             |                         |                  |
| Goms13-T17158_MW525287          | 94.88                | 94.88                  | 95.54                          | 95.54                   | 95.54                   | 95.75                   | 95.32                  | 95.32                 |                        |                            |                  |                  |             |                         |                  |
| Galozero14-T20426_MN604229      | 94.88                | 94.88                  | 95.10                          | 95.54                   | 95.10                   | 94.88                   | 95.32                  | 95.32                 | 97.47                  |                            |                  |                  |             |                         |                  |
| Mias519_MN648776                | 95.32                | 95.32                  | 95.97                          | 95.97                   | 95.97                   | 95.75                   | 95.32                  | 95.32                 | 97.90                  | 97.47                      |                  |                  |             |                         |                  |
| Mias506_MW525319                | 95.32                | 95.32                  | 95.97                          | 95.97                   | 95.97                   | 95.75                   | 95.32                  | 95.32                 | 97.90                  | 97.47                      | 100.00           |                  |             |                         |                  |
| H3_MH158416                     | 93.78                | 93.78                  | 94.00                          | 94.00                   | 94.00                   | 94.66                   | 95.10                  | 95.10                 | 96.83                  | 96.40                      | 96.40            | 96.40            |             |                         |                  |
| Erjey17-T25134_MW525295         | 93.78                | 93.78                  | 94.44                          | 94.44                   | 94.44                   | 94.22                   | 94.66                  | 94.66                 | 97.26                  | 96.62                      | 96.83            | 96.83            | 97.90       |                         |                  |
| Mias527_MN648772                | 93.78                | 93.78                  | 94.44                          | 94.44                   | 94.44                   | 93.78                   | 93.78                  | 93.78                 | 96.83                  | 95.75                      | 95.97            | 95.97            | 97.26       | 99.16                   |                  |
| Mias502_MW525315                | 94.22                | 94.22                  | 94.88                          | 94.88                   | 94.88                   | 94.22                   | 94.22                  | 94.22                 | 97.26                  | 96.19                      | 96.40            | 96.40            | 97.69       | 99.16                   | 99.58            |

Analyses were conducted using the Poisson correction model [9]. This analysis involved 16 amino acid sequences. The coding data was translated assuming a Standard genetic code table. All positions containing gaps and missing data were eliminated (complete deletion option). There were a total of 481 positions in the final dataset. Evolutionary analyses were conducted in MEGA X [8]. Colour indicates from what tick species the strain was isolated: green – *Ixodes ricinus*, red – *Ixodes persulcatus*.

**Table S6.** Percent identity of the nucleotide sequences of the protein VP1b of 16 strains of the Alongshan virus. GenBank accession numbers for each strain are presented in the table.

| Strain_GenBank accession number | Kuutsalo-23_MN107154 | Haapasaari-18_MN107158 | JMTV/I.ricinus/France_MN095520 | Rowan19-T32778_MW525310 | Kursh18-T30290_MW525309 | Kursh18-T30284_MW525306 | Ulya15-T22688_MW525312 | Tat14-T21924_MW525313 | Goms13-T17158_MW525287 | Galozero14-T20426_MN604229 | Miass519_MN648776 | Miass506_MW525319 | H3_MH158416 | Erjey17-T25134_MW525295 | Miass527_MN648772 |
|---------------------------------|----------------------|------------------------|--------------------------------|-------------------------|-------------------------|-------------------------|------------------------|-----------------------|------------------------|----------------------------|-------------------|-------------------|-------------|-------------------------|-------------------|
| Haapasaari-18_MN107158          | 98.76                |                        |                                |                         |                         |                         |                        |                       |                        |                            |                   |                   |             |                         |                   |
| JMTV/I.ricinus/France_MN095520  | 98.55                | 98.34                  |                                |                         |                         |                         |                        |                       |                        |                            |                   |                   |             |                         |                   |
| Rowan19-T32778_MW525310         | 99.07                | 98.66                  | 98.66                          |                         |                         |                         |                        |                       |                        |                            |                   |                   |             |                         |                   |
| Kursh18-T30290_MW525309         | 98.87                | 98.24                  | 98.24                          | 98.77                   |                         |                         |                        |                       |                        |                            |                   |                   |             |                         |                   |
| Kursh18-T30284_MW525306         | 96.52                | 96.41                  | 96.41                          | 96.74                   | 96.63                   |                         |                        |                       |                        |                            |                   |                   |             |                         |                   |
| Ulya15-T22688_MW525312          | 93.70                | 93.83                  | 93.83                          | 93.48                   | 94.05                   | 93.60                   |                        |                       |                        |                            |                   |                   |             |                         |                   |
| Tat14-T21924_MW525313           | 93.81                | 94.05                  | 94.05                          | 93.70                   | 94.05                   | 93.25                   | 98.97                  |                       |                        |                            |                   |                   |             |                         |                   |
| Goms13-T17158_MW525287          | 92.79                | 92.56                  | 93.25                          | 92.68                   | 93.03                   | 91.98                   | 91.37                  | 91.47                 |                        |                            |                   |                   |             |                         |                   |
| Galozero14-T20426_MN604229      | 92.22                | 92.33                  | 92.21                          | 92.11                   | 92.23                   | 91.85                   | 91.22                  | 91.21                 | 94.53                  |                            |                   |                   |             |                         |                   |
| Miass519_MN648776               | 93.49                | 93.49                  | 93.72                          | 93.38                   | 93.95                   | 93.61                   | 91.84                  | 91.59                 | 95.10                  | 95.31                      |                   |                   |             |                         |                   |
| Miass506_MW525319               | 93.49                | 93.49                  | 93.72                          | 93.38                   | 93.95                   | 93.61                   | 91.84                  | 91.59                 | 95.10                  | 95.31                      | 100.00            |                   |             |                         |                   |
| H3_MH158416                     | 89.86                | 89.87                  | 89.62                          | 90.01                   | 90.60                   | 89.53                   | 89.22                  | 89.57                 | 90.40                  | 89.01                      | 89.65             | 89.65             |             |                         |                   |
| Erjey17-T25134_MW525295         | 90.36                | 89.89                  | 90.61                          | 90.98                   | 90.86                   | 90.26                   | 89.48                  | 90.07                 | 90.76                  | 89.90                      | 90.87             | 90.87             | 92.93       |                         |                   |
| Miass527_MN648772               | 90.58                | 90.11                  | 90.83                          | 90.71                   | 91.31                   | 89.99                   | 89.33                  | 89.93                 | 90.98                  | 89.63                      | 90.38             | 90.38             | 92.68       | 98.13                   |                   |
| Miass502_MW525315               | 90.04                | 89.56                  | 90.29                          | 90.17                   | 90.54                   | 89.44                   | 88.52                  | 89.12                 | 90.20                  | 89.32                      | 89.95             | 89.95             | 91.81       | 97.38                   | 98.86             |

|                       |                           |
|-----------------------|---------------------------|
| <i>Ixodes ricinus</i> | <i>Ixodes persulcatus</i> |
|-----------------------|---------------------------|

Analyses were conducted using the Maximum Composite Likelihood model [7]. This analysis involved 16 nucleotide sequences. Codon positions included were 1st+2nd+3rd+Noncoding. All positions containing gaps and missing data were eliminated (complete deletion option). There were a total of 981 positions in the final dataset. Evolutionary analyses were conducted in MEGA X [8].

**Table S7.** Percent identity of the amino acid sequences of the protein VP1b of 16 strains of the Alongshan virus. GenBank accession numbers for each strain are presented in the table.

| Strain_GenBank accession number | Kuutsalo-23_MN107154 | Haapasaari-18_MN107158 | JMTV/I.ricinus/France_MN095520 | Rowan19-T32778_MW525310 | Kursh18-T30290_MW525309 | Kursh18-T30284_MW525306 | Ulya15-T22688_MW525312 | Tat14-T21924_MW525313 | Goms13-T17158_MW525287 | Galozero14-T20426_MN604229 | Miass519_MN648776 | Miass506_MW525319 | H3_MH158416 | Erjey17-T25134_MW525295 | Miass527_MN648772 |
|---------------------------------|----------------------|------------------------|--------------------------------|-------------------------|-------------------------|-------------------------|------------------------|-----------------------|------------------------|----------------------------|-------------------|-------------------|-------------|-------------------------|-------------------|
| Haapasaari-18_MN107158          | 100.00               |                        |                                |                         |                         |                         |                        |                       |                        |                            |                   |                   |             |                         |                   |
| JMTV/I.ricinus/France_MN095520  | 100.00               | 100.00                 |                                |                         |                         |                         |                        |                       |                        |                            |                   |                   |             |                         |                   |
| Rowan19-T32778_MW525310         | 100.00               | 100.00                 | 100.00                         |                         |                         |                         |                        |                       |                        |                            |                   |                   |             |                         |                   |
| Kursh18-T30290_MW525309         | 100.00               | 100.00                 | 100.00                         | 100.00                  |                         |                         |                        |                       |                        |                            |                   |                   |             |                         |                   |
| Kursh18-T30284_MW525306         | 99.69                | 99.69                  | 99.69                          | 99.69                   | 99.69                   |                         |                        |                       |                        |                            |                   |                   |             |                         |                   |
| Ulya15-T22688_MW525312          | 99.38                | 99.38                  | 99.38                          | 99.38                   | 99.38                   | 99.08                   |                        |                       |                        |                            |                   |                   |             |                         |                   |
| Tat14-T21924_MW525313           | 99.69                | 99.69                  | 99.69                          | 99.69                   | 99.69                   | 99.38                   | 99.69                  |                       |                        |                            |                   |                   |             |                         |                   |
| Goms13-T17158_MW525287          | 98.45                | 98.45                  | 98.45                          | 98.45                   | 98.45                   | 98.14                   | 98.14                  | 98.14                 |                        |                            |                   |                   |             |                         |                   |
| Galozero14-T20426_MN604229      | 99.08                | 99.08                  | 99.08                          | 99.08                   | 99.08                   | 98.77                   | 98.45                  | 98.77                 | 98.14                  |                            |                   |                   |             |                         |                   |
| Miass519_MN648776               | 99.38                | 99.38                  | 99.38                          | 99.38                   | 99.38                   | 99.08                   | 98.77                  | 99.08                 | 98.45                  | 99.08                      |                   |                   |             |                         |                   |
| Miass506_MW525319               | 99.38                | 99.38                  | 99.38                          | 99.38                   | 99.38                   | 99.08                   | 98.77                  | 99.08                 | 98.45                  | 99.08                      | 100.00            |                   |             |                         |                   |
| H3_MH158416                     | 97.83                | 97.83                  | 97.83                          | 97.83                   | 97.83                   | 97.52                   | 97.20                  | 97.52                 | 97.52                  | 97.52                      | 97.83             | 97.83             |             |                         |                   |
| Erjey17-T25134_MW525295         | 97.52                | 97.52                  | 97.52                          | 97.52                   | 97.52                   | 97.20                   | 96.88                  | 97.20                 | 97.20                  | 97.20                      | 97.52             | 97.52             | 99.08       |                         |                   |
| Miass527_MN648772               | 97.20                | 97.20                  | 97.20                          | 97.20                   | 97.20                   | 96.88                   | 96.57                  | 96.88                 | 96.88                  | 96.88                      | 97.20             | 97.20             | 98.77       | 99.08                   |                   |
| Miass502_MW525315               | 96.57                | 96.57                  | 96.57                          | 96.57                   | 96.57                   | 96.25                   | 95.93                  | 96.25                 | 96.25                  | 96.25                      | 96.57             | 96.57             | 98.14       | 98.45                   | 98.77             |

|  |                       |  |                           |
|--|-----------------------|--|---------------------------|
|  | <i>Ixodes ricinus</i> |  | <i>Ixodes persulcatus</i> |
|--|-----------------------|--|---------------------------|

Analyses were conducted using the Poisson correction model [9]. This analysis involved 16 amino acid sequences. The coding data was translated assuming a Standard genetic code table. All positions containing gaps and missing data were eliminated (complete deletion option). There were a total of 326 positions in the final dataset. Evolutionary analyses were conducted in MEGA X [8].

**Table S8.** Percent identity of the nucleotide sequences of the protein VP1a of 29 strains of the Yanggou tick virus. GenBank accession numbers for each strain are presented in the table.

| Strain_GenBank accession number   | 16-T2_MH688533 | 17-L1_MH688537 | Erzin14-T20074_MW525323 | XJ-YGTV-1_MT248419 | YG_MH688530 | Republic_Altay/997/2016_MW556731 | Republic_Altay/1001/2016_MW556735 | Bredy14-T19813_OP125785 | Bredy14-T19463_OP125781 | Mir15-T22470_OP125797 | Zaozernyy15-T22264_OP125799 | Bredy15-T22208_ON448367 | Plast15-T22415_ON448374 | Bredy14-T19767_OP125784 | Bredy14-T19736_OP125782 | Bredy14-T19741_OP125783 | Kartaly14-T19346_OP125793 | Kartaly14-T19309_OP125791 | Kartaly14-T19314_OP125792 | Kartaly14-T19658_OP125795 | Fershampenuaz14-T19014_OP125789 | Kartaly14-T19551_OP125794 | Bredy15-T22181_OP125786 | Bredy15-T22188_OP125787 | Bredy15-T22189_OP125788 | Kartaly15-T22141_OP125796 | Plast15-T22438_OP125798 | Plast15-T22436_ON448356 |
|-----------------------------------|----------------|----------------|-------------------------|--------------------|-------------|----------------------------------|-----------------------------------|-------------------------|-------------------------|-----------------------|-----------------------------|-------------------------|-------------------------|-------------------------|-------------------------|-------------------------|---------------------------|---------------------------|---------------------------|---------------------------|---------------------------------|---------------------------|-------------------------|-------------------------|-------------------------|---------------------------|-------------------------|-------------------------|
| 17-L1_MH688537                    | 99.62          |                |                         |                    |             |                                  |                                   |                         |                         |                       |                             |                         |                         |                         |                         |                         |                           |                           |                           |                           |                                 |                           |                         |                         |                         |                           |                         |                         |
| Erzin14-T20074_MW525323           | 94.51          | 94.77          |                         |                    |             |                                  |                                   |                         |                         |                       |                             |                         |                         |                         |                         |                         |                           |                           |                           |                           |                                 |                           |                         |                         |                         |                           |                         |                         |
| XJ-YGTV-1_MT248419                | 96.25          | 96.66          | 95.68                   |                    |             |                                  |                                   |                         |                         |                       |                             |                         |                         |                         |                         |                         |                           |                           |                           |                           |                                 |                           |                         |                         |                         |                           |                         |                         |
| YG_MH688530                       | 99.08          | 99.01          | 94.93                   | 97.06              |             |                                  |                                   |                         |                         |                       |                             |                         |                         |                         |                         |                         |                           |                           |                           |                           |                                 |                           |                         |                         |                         |                           |                         |                         |
| Republic_Altay/997/2016_MW556731  | 98.00          | 98.08          | 95.10                   | 96.41              | 98.39       |                                  |                                   |                         |                         |                       |                             |                         |                         |                         |                         |                         |                           |                           |                           |                           |                                 |                           |                         |                         |                         |                           |                         |                         |
| Republic_Altay/1001/2016_MW556735 | 98.00          | 98.08          | 95.10                   | 96.41              | 98.39       | 100.00                           |                                   |                         |                         |                       |                             |                         |                         |                         |                         |                         |                           |                           |                           |                           |                                 |                           |                         |                         |                         |                           |                         |                         |
| Bredy14-T19813_OP125785           | 97.92          | 98.00          | 94.93                   | 95.77              | 98.16       | 98.39                            | 98.39                             |                         |                         |                       |                             |                         |                         |                         |                         |                         |                           |                           |                           |                           |                                 |                           |                         |                         |                         |                           |                         |                         |
| Bredy14-T19463_OP125781           | 97.13          | 97.37          | 95.68                   | 96.10              | 97.53       | 97.92                            | 97.92                             | 97.53                   |                         |                       |                             |                         |                         |                         |                         |                         |                           |                           |                           |                           |                                 |                           |                         |                         |                         |                           |                         |                         |
| Mir15-T22470_OP125797             | 96.65          | 96.89          | 95.43                   | 95.86              | 97.05       | 97.45                            | 97.45                             | 97.21                   | 98.62                   |                       |                             |                         |                         |                         |                         |                         |                           |                           |                           |                           |                                 |                           |                         |                         |                         |                           |                         |                         |
| Zaozernyy15-T22264_OP125799       | 97.13          | 97.37          | 95.76                   | 96.18              | 97.52       | 97.92                            | 97.92                             | 97.68                   | 99.08                   | 99.54                 |                             |                         |                         |                         |                         |                         |                           |                           |                           |                           |                                 |                           |                         |                         |                         |                           |                         |                         |
| Bredy15-T22208_ON448367           | 97.21          | 97.45          | 95.84                   | 96.26              | 97.60       | 97.84                            | 97.84                             | 97.45                   | 99.01                   | 99.32                 | 99.77                       |                         |                         |                         |                         |                         |                           |                           |                           |                           |                                 |                           |                         |                         |                         |                           |                         |                         |
| Plast15-T22415_ON448374           | 97.13          | 97.37          | 95.76                   | 96.18              | 97.52       | 97.92                            | 97.92                             | 97.68                   | 99.08                   | 99.54                 | 100.00                      | 99.77                   |                         |                         |                         |                         |                           |                           |                           |                           |                                 |                           |                         |                         |                         |                           |                         |                         |
| Bredy14-T19767_OP125784           | 97.28          | 97.52          | 95.92                   | 96.34              | 97.68       | 97.92                            | 97.92                             | 97.52                   | 98.93                   | 99.24                 | 99.70                       | 99.92                   | 99.70                   |                         |                         |                         |                           |                           |                           |                           |                                 |                           |                         |                         |                         |                           |                         |                         |
| Bredy14-T19736_OP125782           | 96.81          | 97.05          | 95.59                   | 95.86              | 97.20       | 97.60                            | 97.60                             | 97.37                   | 98.78                   | 99.24                 | 99.70                       | 99.47                   | 99.70                   | 99.39                   |                         |                         |                           |                           |                           |                           |                                 |                           |                         |                         |                         |                           |                         |                         |
| Bredy14-T19741_OP125783           | 97.05          | 97.29          | 95.67                   | 96.10              | 97.44       | 97.84                            | 97.84                             | 97.60                   | 99.01                   | 99.47                 | 99.92                       | 99.70                   | 99.92                   | 99.62                   | 99.62                   |                         |                           |                           |                           |                           |                                 |                           |                         |                         |                         |                           |                         |                         |
| Kartaly14-T19346_OP125793         | 96.41          | 96.65          | 95.19                   | 95.77              | 96.97       | 97.21                            | 97.21                             | 97.13                   | 98.39                   | 98.78                 | 99.24                       | 99.01                   | 99.24                   | 98.93                   | 99.09                   | 99.16                   |                           |                           |                           |                           |                                 |                           |                         |                         |                         |                           |                         |                         |
| Kartaly14-T19309_OP125791         | 97.29          | 97.37          | 96.00                   | 96.10              | 97.68       | 97.92                            | 97.92                             | 97.53                   | 98.62                   | 98.31                 | 98.78                       | 98.70                   | 98.78                   | 98.78                   | 98.47                   | 98.70                   | 98.08                     |                           |                           |                           |                                 |                           |                         |                         |                         |                           |                         |                         |
| Kartaly14-T19314_OP125792         | 97.45          | 97.69          | 96.00                   | 96.42              | 97.84       | 98.23                            | 98.23                             | 97.84                   | 99.70                   | 98.62                 | 99.08                       | 99.01                   | 99.08                   | 99.08                   | 98.78                   | 99.01                   | 98.39                     | 98.93                     |                           |                           |                                 |                           |                         |                         |                         |                           |                         |                         |
| Kartaly14-T19658_OP125795         | 97.45          | 97.53          | 96.16                   | 96.26              | 97.84       | 98.08                            | 98.08                             | 97.69                   | 98.78                   | 98.47                 | 98.93                       | 98.85                   | 98.93                   | 98.93                   | 98.62                   | 98.85                   | 98.24                     | 99.85                     | 99.09                     |                           |                                 |                           |                         |                         |                         |                           |                         |                         |
| Fershampenuaz14-T19014_OP125789   | 96.56          | 96.81          | 95.35                   | 95.61              | 96.96       | 97.52                            | 97.52                             | 97.13                   | 98.70                   | 99.01                 | 99.47                       | 99.24                   | 99.47                   | 99.16                   | 99.16                   | 99.39                   | 98.70                     | 98.23                     | 98.54                     | 98.39                     |                                 |                           |                         |                         |                         |                           |                         |                         |
| Kartaly14-T19551_OP125794         | 96.97          | 97.21          | 95.59                   | 96.02              | 97.36       | 97.76                            | 97.76                             | 97.53                   | 98.93                   | 99.39                 | 99.85                       | 99.62                   | 99.85                   | 99.54                   | 99.54                   | 99.92                   | 99.09                     | 98.62                     | 98.93                     | 98.78                     | 99.32                           |                           |                         |                         |                         |                           |                         |                         |
| Bredy15-T22181_OP125786           | 97.05          | 97.29          | 95.84                   | 96.26              | 97.44       | 97.84                            | 97.84                             | 97.45                   | 98.85                   | 99.16                 | 99.62                       | 99.54                   | 99.62                   | 99.62                   | 99.32                   | 99.54                   | 98.86                     | 98.70                     | 99.01                     | 98.85                     | 99.09                           | 99.47                     |                         |                         |                         |                           |                         |                         |
| Bredy15-T22188_OP125787           | 97.05          | 97.29          | 95.67                   | 96.10              | 97.44       | 97.84                            | 97.84                             | 97.76                   | 99.01                   | 99.47                 | 99.92                       | 99.70                   | 99.92                   | 99.62                   | 99.62                   | 99.85                   | 99.16                     | 98.70                     | 99.01                     | 98.85                     | 99.39                           | 99.77                     | 99.54                   |                         |                         |                           |                         |                         |
| Bredy15-T22189_OP125788           | 96.73          | 96.97          | 95.51                   | 95.93              | 97.12       | 97.68                            | 97.68                             | 97.29                   | 98.85                   | 99.01                 | 99.47                       | 99.24                   | 99.47                   | 99.16                   | 99.16                   | 99.39                   | 98.70                     | 98.39                     | 98.70                     | 98.54                     | 99.54                           | 99.32                     | 99.09                   | 99.39                   |                         |                           |                         |                         |
| Kartaly15-T22141_OP125796         | 96.65          | 96.89          | 95.43                   | 95.70              | 97.05       | 97.45                            | 97.45                             | 97.21                   | 98.62                   | 99.24                 | 99.55                       | 99.32                   | 99.55                   | 99.24                   | 99.54                   | 99.47                   | 98.93                     | 98.31                     | 98.62                     | 98.47                     | 99.01                           | 99.39                     | 99.16                   | 99.47                   | 99.01                   |                           |                         |                         |
| Plast15-T22438_OP125798           | 96.49          | 96.73          | 95.27                   | 95.69              | 96.89       | 97.29                            | 97.29                             | 97.05                   | 98.47                   | 99.85                 | 99.39                       | 99.16                   | 99.39                   | 99.09                   | 99.09                   | 99.32                   | 98.63                     | 98.31                     | 98.47                     | 98.47                     | 98.86                           | 99.24                     | 99.01                   | 99.32                   | 98.86                   | 99.09                     |                         |                         |
| Plast15-T22436_ON448356           | 96.96          | 97.21          | 95.42                   | 95.93              | 97.36       | 97.76                            | 97.76                             | 97.52                   | 98.78                   | 99.16                 | 99.62                       | 99.39                   | 99.62                   | 99.32                   | 99.32                   | 99.54                   | 99.01                     | 98.47                     | 98.78                     | 98.62                     | 99.08                           | 99.47                     | 99.24                   | 99.54                   | 99.08                   | 99.16                     | 99.01                   |                         |
| Gubenka15-T22237_OP125790         | 97.13          | 97.37          | 95.76                   | 96.18              | 97.52       | 97.92                            | 97.92                             | 97.68                   | 99.08                   | 99.54                 | 100.00                      | 99.77                   | 100.00                  | 99.70                   | 99.70                   | 99.92                   | 99.24                     | 98.78                     | 99.08                     | 98.93                     | 99.47                           | 99.85                     | 99.62                   | 99.92                   | 99.47                   | 99.55                     | 99.39                   | 99.62                   |

Analyses were conducted using the Maximum Composite Likelihood model [7]. This analysis involved 29 nucleotide sequences. Codon positions included were 1st+2nd+3rd+Noncoding. All positions containing gaps and missing data were eliminated (complete deletion option). There were a total of 1323 positions in the final dataset.



Evolutionary analyses were conducted in MEGA X [8]. Colour indicates from what tick species the strain was isolated: green – *Dermacentor nuttalli*, blue – *Dermacentor marginatus*, orange – *Dermacentor reticulatus*, red – *Ixodes persulcatus*.

**Table S9.** Percent identity of the amino acid sequences of the protein VP1a of 29 strains of the Yanggou tick virus. GenBank accession numbers for each strain are presented in the table.

| Strain_GenBank accession number   | 16-T2_MH688533 | 17-L1_MH688537 | Erzin14-T20074_MW525323 | XJ-YGTV-1_MT248419 | YG_MH688530 | Republic_Altay/997/2016_MW556731 | Republic_Altay/1001/2016_MW556735 | Bredy14-T19813_OP125785 | Bredy14-T19463_OP125781 | Mir15-T22470_OP125797 | Zaozernyy15-T22264_OP125799 | Bredy15-T22208_ON448367 | Plast15-T22415_ON448374 | Bredy14-T19767_OP125784 | Bredy14-T19736_OP125782 | Bredy14-T19741_OP125783 | Kartaly14-T19346_OP125793 | Kartaly14-T19309_OP125791 | Kartaly14-T19314_OP125792 | Kartaly14-T19658_OP125795 | Fershampenuaz14-T19014_OP125789 | Kartaly14-T19551_OP125794 | Bredy15-T22181_OP125786 | Bredy15-T22188_OP125787 | Bredy15-T22189_OP125788 | Kartaly15-T22141_OP125796 | Plast15-T22438_OP125798 | Plast15-T22436_ON448356 |
|-----------------------------------|----------------|----------------|-------------------------|--------------------|-------------|----------------------------------|-----------------------------------|-------------------------|-------------------------|-----------------------|-----------------------------|-------------------------|-------------------------|-------------------------|-------------------------|-------------------------|---------------------------|---------------------------|---------------------------|---------------------------|---------------------------------|---------------------------|-------------------------|-------------------------|-------------------------|---------------------------|-------------------------|-------------------------|
| 17-L1_MH688537                    | 99.77          |                |                         |                    |             |                                  |                                   |                         |                         |                       |                             |                         |                         |                         |                         |                         |                           |                           |                           |                           |                                 |                           |                         |                         |                         |                           |                         |                         |
| Erzin14-T20074_MW525323           | 97.70          | 97.93          |                         |                    |             |                                  |                                   |                         |                         |                       |                             |                         |                         |                         |                         |                         |                           |                           |                           |                           |                                 |                           |                         |                         |                         |                           |                         |                         |
| XJ-YGTV-1_MT248419                | 98.62          | 98.85          | 98.16                   |                    |             |                                  |                                   |                         |                         |                       |                             |                         |                         |                         |                         |                         |                           |                           |                           |                           |                                 |                           |                         |                         |                         |                           |                         |                         |
| YG_MH688530                       | 99.77          | 100.00         | 97.93                   | 98.85              |             |                                  |                                   |                         |                         |                       |                             |                         |                         |                         |                         |                         |                           |                           |                           |                           |                                 |                           |                         |                         |                         |                           |                         |                         |
| Republic_Altay/997/2016_MW556731  | 98.62          | 98.85          | 96.76                   | 98.16              | 98.85       |                                  |                                   |                         |                         |                       |                             |                         |                         |                         |                         |                         |                           |                           |                           |                           |                                 |                           |                         |                         |                         |                           |                         |                         |
| Republic_Altay/1001/2016_MW556735 | 98.62          | 98.85          | 96.76                   | 98.16              | 98.85       | 100.00                           |                                   |                         |                         |                       |                             |                         |                         |                         |                         |                         |                           |                           |                           |                           |                                 |                           |                         |                         |                         |                           |                         |                         |
| Bredy14-T19813_OP125785           | 98.62          | 98.85          | 96.76                   | 97.70              | 98.85       | 98.62                            | 98.62                             |                         |                         |                       |                             |                         |                         |                         |                         |                         |                           |                           |                           |                           |                                 |                           |                         |                         |                         |                           |                         |                         |
| Bredy14-T19463_OP125781           | 98.85          | 99.08          | 96.99                   | 97.93              | 99.08       | 98.85                            | 98.85                             | 98.39                   |                         |                       |                             |                         |                         |                         |                         |                         |                           |                           |                           |                           |                                 |                           |                         |                         |                         |                           |                         |                         |
| Mir15-T22470_OP125797             | 98.62          | 98.85          | 96.76                   | 97.70              | 98.85       | 98.62                            | 98.62                             | 98.16                   | 98.85                   |                       |                             |                         |                         |                         |                         |                         |                           |                           |                           |                           |                                 |                           |                         |                         |                         |                           |                         |                         |
| Zaozernyy15-T22264_OP125799       | 99.08          | 99.31          | 97.23                   | 98.16              | 99.31       | 99.08                            | 99.08                             | 98.62                   | 99.31                   | 99.54                 |                             |                         |                         |                         |                         |                         |                           |                           |                           |                           |                                 |                           |                         |                         |                         |                           |                         |                         |
| Bredy15-T22208_ON448367           | 99.31          | 99.54          | 97.46                   | 98.39              | 99.54       | 98.85                            | 98.85                             | 98.39                   | 99.08                   | 99.31                 | 99.77                       |                         |                         |                         |                         |                         |                           |                           |                           |                           |                                 |                           |                         |                         |                         |                           |                         |                         |
| Plast15-T22415_ON448374           | 99.08          | 99.31          | 97.23                   | 98.16              | 99.31       | 99.08                            | 99.08                             | 98.62                   | 99.31                   | 99.54                 | 100.00                      | 99.77                   |                         |                         |                         |                         |                           |                           |                           |                           |                                 |                           |                         |                         |                         |                           |                         |                         |
| Bredy14-T19767_OP125784           | 99.31          | 99.54          | 97.46                   | 98.39              | 99.54       | 98.85                            | 98.85                             | 98.39                   | 99.08                   | 99.31                 | 99.77                       | 100.00                  | 99.77                   |                         |                         |                         |                           |                           |                           |                           |                                 |                           |                         |                         |                         |                           |                         |                         |
| Bredy14-T19736_OP125782           | 98.62          | 98.85          | 96.76                   | 97.70              | 98.85       | 98.62                            | 98.62                             | 98.16                   | 98.85                   | 99.08                 | 99.54                       | 99.31                   | 99.54                   | 99.31                   |                         |                         |                           |                           |                           |                           |                                 |                           |                         |                         |                         |                           |                         |                         |
| Bredy14-T19741_OP125783           | 99.08          | 99.31          | 97.23                   | 98.16              | 99.31       | 99.08                            | 99.08                             | 98.62                   | 99.31                   | 99.54                 | 100.00                      | 99.77                   | 100.00                  | 99.77                   | 99.54                   |                         |                           |                           |                           |                           |                                 |                           |                         |                         |                         |                           |                         |                         |
| Kartaly14-T19346_OP125793         | 98.16          | 98.39          | 96.29                   | 97.70              | 98.39       | 98.16                            | 98.16                             | 97.70                   | 98.39                   | 98.62                 | 99.08                       | 98.85                   | 99.08                   | 98.85                   | 98.62                   | 99.08                   |                           |                           |                           |                           |                                 |                           |                         |                         |                         |                           |                         |                         |
| Kartaly14-T19309_OP125791         | 98.85          | 99.08          | 96.99                   | 97.93              | 99.08       | 98.85                            | 98.85                             | 98.39                   | 99.08                   | 98.85                 | 99.31                       | 99.08                   | 99.31                   | 99.08                   | 98.85                   | 99.31                   | 98.39                     |                           |                           |                           |                                 |                           |                         |                         |                         |                           |                         |                         |
| Kartaly14-T19314_OP125792         | 99.08          | 99.31          | 97.23                   | 98.16              | 99.31       | 99.08                            | 99.08                             | 98.62                   | 99.77                   | 99.08                 | 99.54                       | 99.31                   | 99.54                   | 99.31                   | 99.08                   | 99.54                   | 98.62                     | 99.31                     |                           |                           |                                 |                           |                         |                         |                         |                           |                         |                         |
| Kartaly14-T19658_OP125795         | 99.31          | 99.54          | 97.46                   | 98.39              | 99.54       | 99.31                            | 99.31                             | 98.85                   | 99.54                   | 99.31                 | 99.77                       | 99.54                   | 99.77                   | 99.54                   | 99.31                   | 99.77                   | 98.85                     | 99.54                     | 99.77                     |                           |                                 |                           |                         |                         |                         |                           |                         |                         |
| Fershampenuaz14-T19014_OP125789   | 98.39          | 98.62          | 96.76                   | 97.46              | 98.62       | 98.39                            | 98.39                             | 97.93                   | 99.08                   | 98.85                 | 99.31                       | 99.08                   | 99.31                   | 99.08                   | 98.85                   | 99.31                   | 98.39                     | 98.62                     | 98.85                     | 99.08                     |                                 |                           |                         |                         |                         |                           |                         |                         |
| Kartaly14-T19551_OP125794         | 98.85          | 99.08          | 96.99                   | 97.93              | 99.08       | 98.85                            | 98.85                             | 98.39                   | 99.08                   | 99.31                 | 99.77                       | 99.54                   | 99.77                   | 99.54                   | 99.31                   | 99.77                   | 98.85                     | 99.08                     | 99.31                     | 99.54                     | 99.08                           |                           |                         |                         |                         |                           |                         |                         |
| Bredy15-T22181_OP125786           | 98.85          | 99.08          | 97.46                   | 98.39              | 99.08       | 98.85                            | 98.85                             | 98.39                   | 99.08                   | 99.31                 | 99.77                       | 99.54                   | 99.77                   | 99.54                   | 99.31                   | 99.77                   | 98.85                     | 99.08                     | 99.31                     | 99.54                     | 99.08                           | 99.54                     |                         |                         |                         |                           |                         |                         |
| Bredy15-T22188_OP125787           | 98.85          | 99.08          | 96.99                   | 97.93              | 99.08       | 98.85                            | 98.85                             | 98.85                   | 99.08                   | 99.31                 | 99.77                       | 99.54                   | 99.77                   | 99.54                   | 99.31                   | 99.77                   | 98.85                     | 99.08                     | 99.31                     | 99.54                     | 99.08                           | 99.54                     | 99.54                   |                         |                         |                           |                         |                         |
| Bredy15-T22189_OP125788           | 98.85          | 99.08          | 96.99                   | 97.93              | 99.08       | 98.85                            | 98.85                             | 98.39                   | 99.54                   | 99.31                 | 99.77                       | 99.54                   | 99.77                   | 99.54                   | 99.31                   | 99.77                   | 98.85                     | 99.08                     | 99.31                     | 99.54                     | 99.54                           | 99.54                     | 99.54                   | 99.54                   |                         |                           |                         |                         |
| Kartaly15-T22141_OP125796         | 98.39          | 98.62          | 96.52                   | 97.46              | 98.62       | 98.39                            | 98.39                             | 97.93                   | 98.62                   | 99.31                 | 99.31                       | 99.08                   | 99.31                   | 99.08                   | 99.31                   | 99.31                   | 98.39                     | 98.62                     | 98.85                     | 99.08                     | 98.62                           | 99.08                     | 99.08                   | 99.08                   | 99.08                   |                           |                         |                         |
| Plast15-T22438_OP125798           | 98.62          | 98.85          | 96.76                   | 97.70              | 98.85       | 98.62                            | 98.62                             | 98.16                   | 98.85                   | 100.00                | 99.54                       | 99.31                   | 99.54                   | 99.31                   | 99.08                   | 99.54                   | 98.62                     | 98.85                     | 99.08                     | 99.31                     | 98.85                           | 99.31                     | 99.31                   | 99.31                   | 99.31                   | 99.31                     |                         |                         |
| Plast15-T22436_ON448356           | 99.08          | 99.31          | 97.23                   | 98.16              | 99.31       | 99.08                            | 99.08                             | 98.62                   | 99.31                   | 99.54                 | 100.00                      | 99.77                   | 100.00                  | 99.77                   | 99.54                   | 100.00                  | 99.08                     | 99.31                     | 99.54                     | 99.77                     | 99.31                           | 99.77                     | 99.77                   | 99.77                   | 99.77                   | 99.31                     | 99.54                   |                         |
| Gubenka15-T22237_OP125790         | 99.08          | 99.31          | 97.23                   | 98.16              | 99.31       | 99.08                            | 99.08                             | 98.62                   | 99.31                   | 99.54                 | 100.00                      | 99.77                   | 100.00                  | 99.77                   | 99.54                   | 100.00                  | 99.08                     | 99.31                     | 99.54                     | 99.77                     | 99.31                           | 99.77                     | 99.77                   | 99.77                   | 99.77                   | 99.31                     | 99.54                   | 100.00                  |

Analyses were conducted using the Poisson correction model [9]. This analysis involved 29 amino acid sequences. The coding data was translated assuming a Standard genetic code table. All positions containing gaps and missing data were eliminated (complete deletion option). There were a total of 439 positions in the final dataset. Evolutionary analyses were

conducted in MEGA X [8]. Colour indicates from what tick species the strain was isolated: green – *Dermacentor nuttalli*, blue – *Dermacentor marginatus*, orange – *Dermacentor reticulatus*, red – *Ixodes persulcatus*.

**Table S10.** Percent identity of the nucleotide sequences of the protein VP1b of 16 strains of the Yanggou tick virus. GenBank accession numbers for each strain are presented in the table.

| Strain_GenBank accession number   | 16-T2_MH688533 | 17-L1_MH688537 | Erzin14-T20074_MW525323 | XJ-YGTV-1_MT248419 | YG_MH688530 | Republic_Altay/997/2016_MW556731 | Republic_Altay/1001/2016_MW556735 | Bredy14-T19767_OP125784 | Kartaly14-T19309_OP125791 | Kartaly14-T19658_OP125795 | Fershampenuaz14-T19014_OP125789 | Kartaly14-T19551_OP125794 | Bredy15-T22181_OP125786 | Bredy15-T22188_OP125787 | Bredy15-T22189_OP125788 |
|-----------------------------------|----------------|----------------|-------------------------|--------------------|-------------|----------------------------------|-----------------------------------|-------------------------|---------------------------|---------------------------|---------------------------------|---------------------------|-------------------------|-------------------------|-------------------------|
| 17-L1_MH688537                    | 99.25          |                |                         |                    |             |                                  |                                   |                         |                           |                           |                                 |                           |                         |                         |                         |
| Erzin14-T20074_MW525323           | 93.58          | 93.59          |                         |                    |             |                                  |                                   |                         |                           |                           |                                 |                           |                         |                         |                         |
| XJ-YGTV-1_MT248419                | 95.41          | 95.42          | 94.19                   |                    |             |                                  |                                   |                         |                           |                           |                                 |                           |                         |                         |                         |
| YG_MH688530                       | 99.12          | 98.61          | 93.43                   | 95.00              |             |                                  |                                   |                         |                           |                           |                                 |                           |                         |                         |                         |
| Republic_Altay/997/2016_MW556731  | 97.71          | 97.97          | 93.74                   | 95.43              | 97.57       |                                  |                                   |                         |                           |                           |                                 |                           |                         |                         |                         |
| Republic_Altay/1001/2016_MW556735 | 97.71          | 97.97          | 93.74                   | 95.43              | 97.57       | 100.00                           |                                   |                         |                           |                           |                                 |                           |                         |                         |                         |
| Bredy14-T19767_OP125784           | 96.92          | 97.45          | 93.34                   | 95.30              | 96.53       | 97.45                            | 97.45                             |                         |                           |                           |                                 |                           |                         |                         |                         |
| Kartaly14-T19309_OP125791         | 96.24          | 96.51          | 93.15                   | 94.59              | 96.11       | 97.31                            | 97.31                             | 98.10                   |                           |                           |                                 |                           |                         |                         |                         |
| Kartaly14-T19658_OP125795         | 96.24          | 96.51          | 93.15                   | 94.59              | 96.11       | 97.31                            | 97.31                             | 98.10                   | 100.00                    |                           |                                 |                           |                         |                         |                         |
| Fershampenuaz14-T19014_OP125789   | 96.92          | 97.44          | 93.32                   | 95.56              | 96.78       | 97.71                            | 97.71                             | 99.00                   | 98.35                     | 98.35                     |                                 |                           |                         |                         |                         |
| Kartaly14-T19551_OP125794         | 96.25          | 97.04          | 92.88                   | 94.87              | 96.11       | 97.32                            | 97.32                             | 98.61                   | 97.70                     | 97.70                     | 98.87                           |                           |                         |                         |                         |
| Bredy15-T22181_OP125786           | 96.65          | 97.18          | 93.04                   | 95.02              | 96.52       | 97.45                            | 97.45                             | 99.25                   | 98.09                     | 98.09                     | 98.99                           | 98.35                     |                         |                         |                         |
| Bredy15-T22188_OP125787           | 97.05          | 97.57          | 93.46                   | 95.43              | 96.91       | 97.58                            | 97.58                             | 98.87                   | 98.22                     | 98.22                     | 99.12                           | 98.48                     | 98.87                   |                         |                         |
| Bredy15-T22189_OP125788           | 96.78          | 97.31          | 93.17                   | 95.42              | 96.64       | 97.57                            | 97.57                             | 98.87                   | 98.22                     | 98.22                     | 99.62                           | 98.74                     | 98.86                   | 98.99                   |                         |
| Plast15-T22438_OP125798           | 96.78          | 97.31          | 93.45                   | 95.15              | 96.65       | 97.31                            | 97.31                             | 98.61                   | 98.22                     | 98.22                     | 98.87                           | 98.22                     | 98.61                   | 99.50                   | 98.74                   |

Analyses were conducted using the Maximum Composite Likelihood model [7]. This analysis involved 16 nucleotide sequences. Codon positions included were 1st+2nd+3rd+Noncoding. All positions containing gaps and missing data were eliminated (complete deletion option). There were a total of 804 positions in the final dataset. Evolutionary analyses were conducted in MEGA X [8]. Colour indicates from what tick species the strain was isolated: green – *Dermacentor nuttalli*, blue – *Dermacentor marginatus*, orange – *Dermacentor reticulatus*.

**Table S11.** Percent identity of the amino acid sequences of the protein VP1b of 16 strains of the Yanggou tick virus. GenBank accession numbers for each strain are presented in the table.

| Strain_GenBank accession number   | 16-T2_MH688533 | 17-L1_MH688537 | Erzin14-T20074_MW525323 | XJ-YGTV-1_MT248419 | YG_MH688530 | Republic_Altay/997/2016_MW556731 | Republic_Altay/1001/2016_MW556735 | Bredy14-T19767_OP125784 | Kartaly14-T19309_OP125791 | Kartaly14-T19658_OP125795 | Fershampenuaz14-T19014_OP125789 | Kartaly14-T19551_OP125794 | Bredy15-T22181_OP125786 | Bredy15-T22188_OP125787 | Bredy15-T22189_OP125788 |
|-----------------------------------|----------------|----------------|-------------------------|--------------------|-------------|----------------------------------|-----------------------------------|-------------------------|---------------------------|---------------------------|---------------------------------|---------------------------|-------------------------|-------------------------|-------------------------|
| 17-L1_MH688537                    | 99.62          |                |                         |                    |             |                                  |                                   |                         |                           |                           |                                 |                           |                         |                         |                         |
| Erzin14-T20074_MW525323           | 99.25          | 99.62          |                         |                    |             |                                  |                                   |                         |                           |                           |                                 |                           |                         |                         |                         |
| XJ-YGTV-1_MT248419                | 98.49          | 98.87          | 99.25                   |                    |             |                                  |                                   |                         |                           |                           |                                 |                           |                         |                         |                         |
| YG_MH688530                       | 99.62          | 100.00         | 99.62                   | 98.87              |             |                                  |                                   |                         |                           |                           |                                 |                           |                         |                         |                         |
| Republic_Altay/997/2016_MW556731  | 99.25          | 99.62          | 100.00                  | 99.25              | 99.62       |                                  |                                   |                         |                           |                           |                                 |                           |                         |                         |                         |
| Republic_Altay/1001/2016_MW556735 | 99.25          | 99.62          | 100.00                  | 99.25              | 99.62       | 100.00                           |                                   |                         |                           |                           |                                 |                           |                         |                         |                         |
| Bredy14-T19767_OP125784           | 99.25          | 99.62          | 99.25                   | 98.49              | 99.62       | 99.25                            | 99.25                             |                         |                           |                           |                                 |                           |                         |                         |                         |
| Kartaly14-T19309_OP125791         | 99.25          | 99.62          | 100.00                  | 99.25              | 99.62       | 100.00                           | 100.00                            | 99.25                   |                           |                           |                                 |                           |                         |                         |                         |
| Kartaly14-T19658_OP125795         | 99.25          | 99.62          | 100.00                  | 99.25              | 99.62       | 100.00                           | 100.00                            | 99.25                   | 100.00                    |                           |                                 |                           |                         |                         |                         |
| Fershampenuaz14-T19014_OP125789   | 99.62          | 100.00         | 99.62                   | 98.87              | 100.00      | 99.62                            | 99.62                             | 99.62                   | 99.62                     | 99.62                     |                                 |                           |                         |                         |                         |
| Kartaly14-T19551_OP125794         | 98.87          | 99.25          | 98.87                   | 98.11              | 99.25       | 98.87                            | 98.87                             | 99.62                   | 98.87                     | 98.87                     | 99.25                           |                           |                         |                         |                         |
| Bredy15-T22181_OP125786           | 99.62          | 100.00         | 99.62                   | 98.87              | 100.00      | 99.62                            | 99.62                             | 99.62                   | 99.62                     | 99.62                     | 100.00                          | 99.25                     |                         |                         |                         |
| Bredy15-T22188_OP125787           | 99.25          | 99.62          | 99.25                   | 98.49              | 99.62       | 99.25                            | 99.25                             | 99.25                   | 99.25                     | 99.25                     | 99.62                           | 98.87                     | 99.62                   |                         |                         |
| Bredy15-T22189_OP125788           | 99.25          | 99.62          | 99.25                   | 98.49              | 99.62       | 99.25                            | 99.25                             | 99.25                   | 99.25                     | 99.25                     | 99.62                           | 98.87                     | 99.62                   | 99.25                   |                         |
| Plast15-T22438_OP125798           | 99.25          | 99.62          | 99.25                   | 98.49              | 99.62       | 99.25                            | 99.25                             | 99.25                   | 99.25                     | 99.25                     | 99.62                           | 98.87                     | 99.62                   | 100.00                  | 99.25                   |

Analyses were conducted using the Poisson correction model [9]. This analysis involved 16 amino acid sequences. The coding data was translated assuming a Standard genetic code table. All positions containing gaps and missing data were eliminated (complete deletion option). There were a total of 267 positions in the final dataset. Evolutionary analyses were conducted in MEGA X [8]. Colour indicates from what tick species the strain was isolated: green – *Dermacentor nuttalli*, blue – *Dermacentor marginatus*, orange – *Dermacentor reticulatus*.

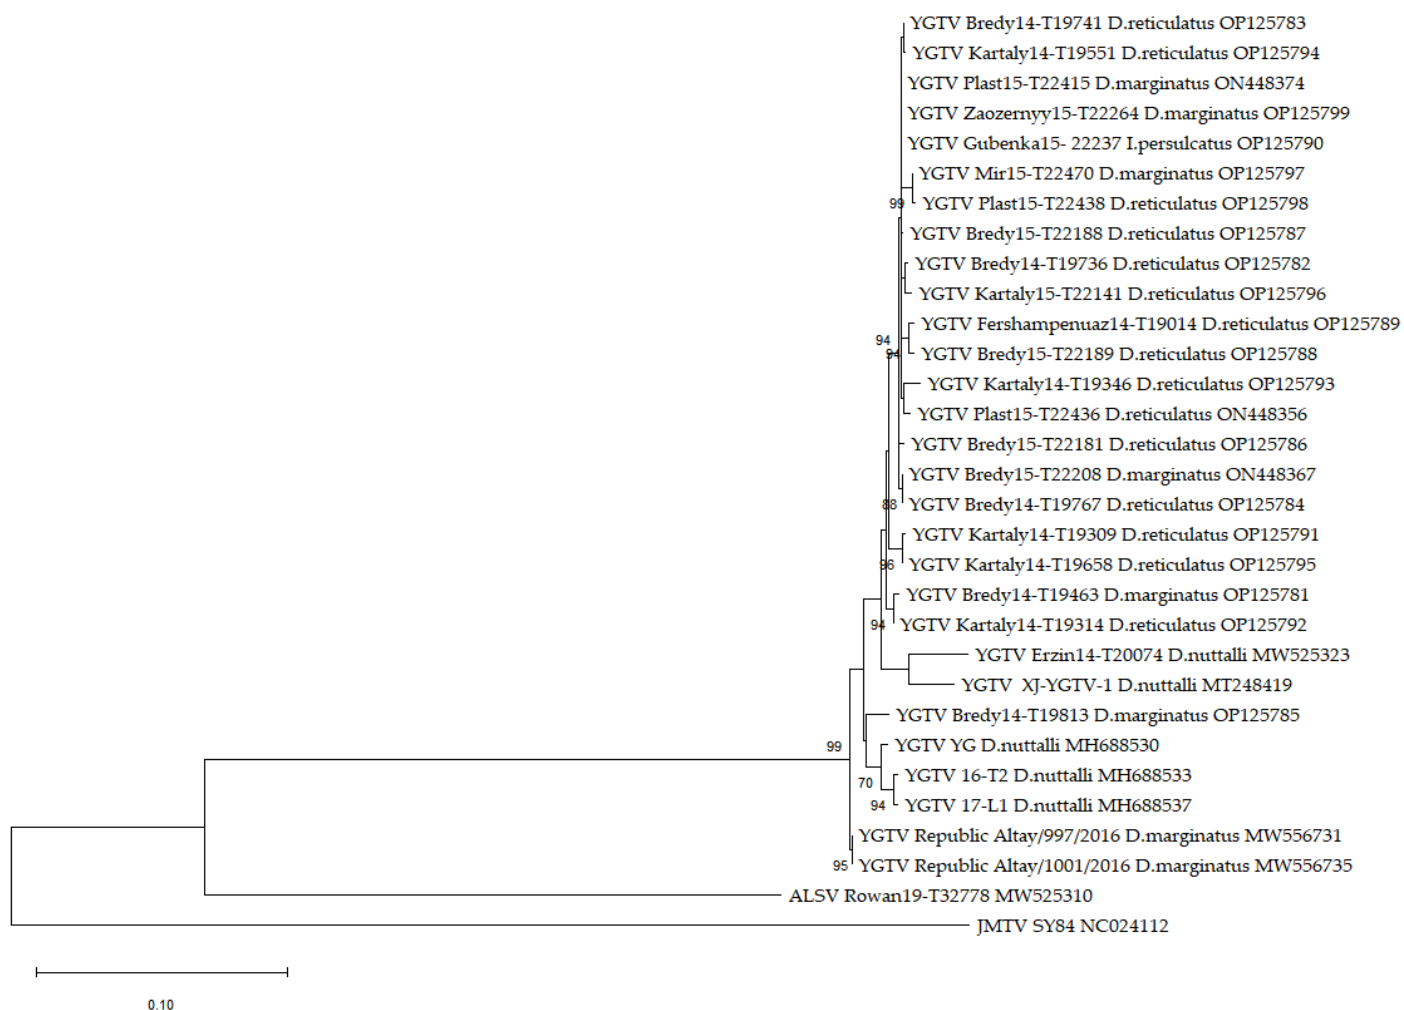

**Figure S1.** Phylogenetic analysis of the complete nucleotide sequence of the Yanggou tick virus VP1a protein. Phylogenetic tree was constructed in MEGA X with the Maximum Likelihood method (1000 bootstrap replications). Bootstrap values (> 70%) are shown at the branches. GenBank accession numbers are listed for each enteries. Yanggou tick virus = YGTV, Alongshan virus = ALSV, Jingmen tick virus = JMTV.

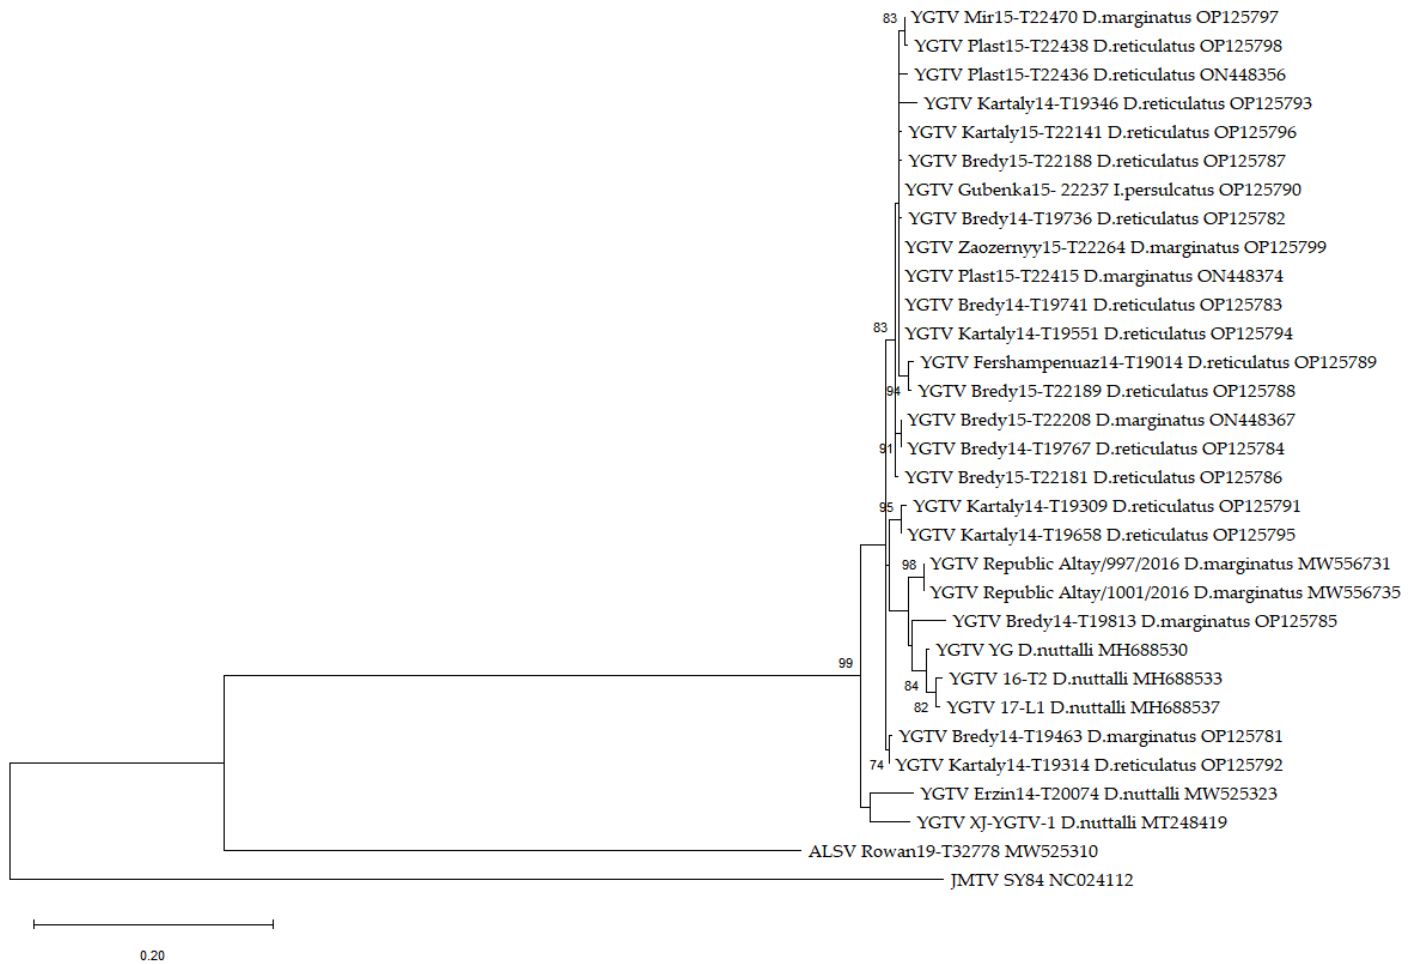

**Figure S2.** Phylogenetic analysis of the complete amino acid sequence of the Yanggou tick virus VP1a protein. Phylogenetic tree was constructed in MEGA X with the Maximum Likelihood method (1000 bootstrap replications). Bootstrap values (> 70%) are shown at the branches. GenBank accession numbers are listed for each entries. Yanggou tick virus = YGTV, Alongshan virus = ALSV, Jingmen tick virus = JMTV.

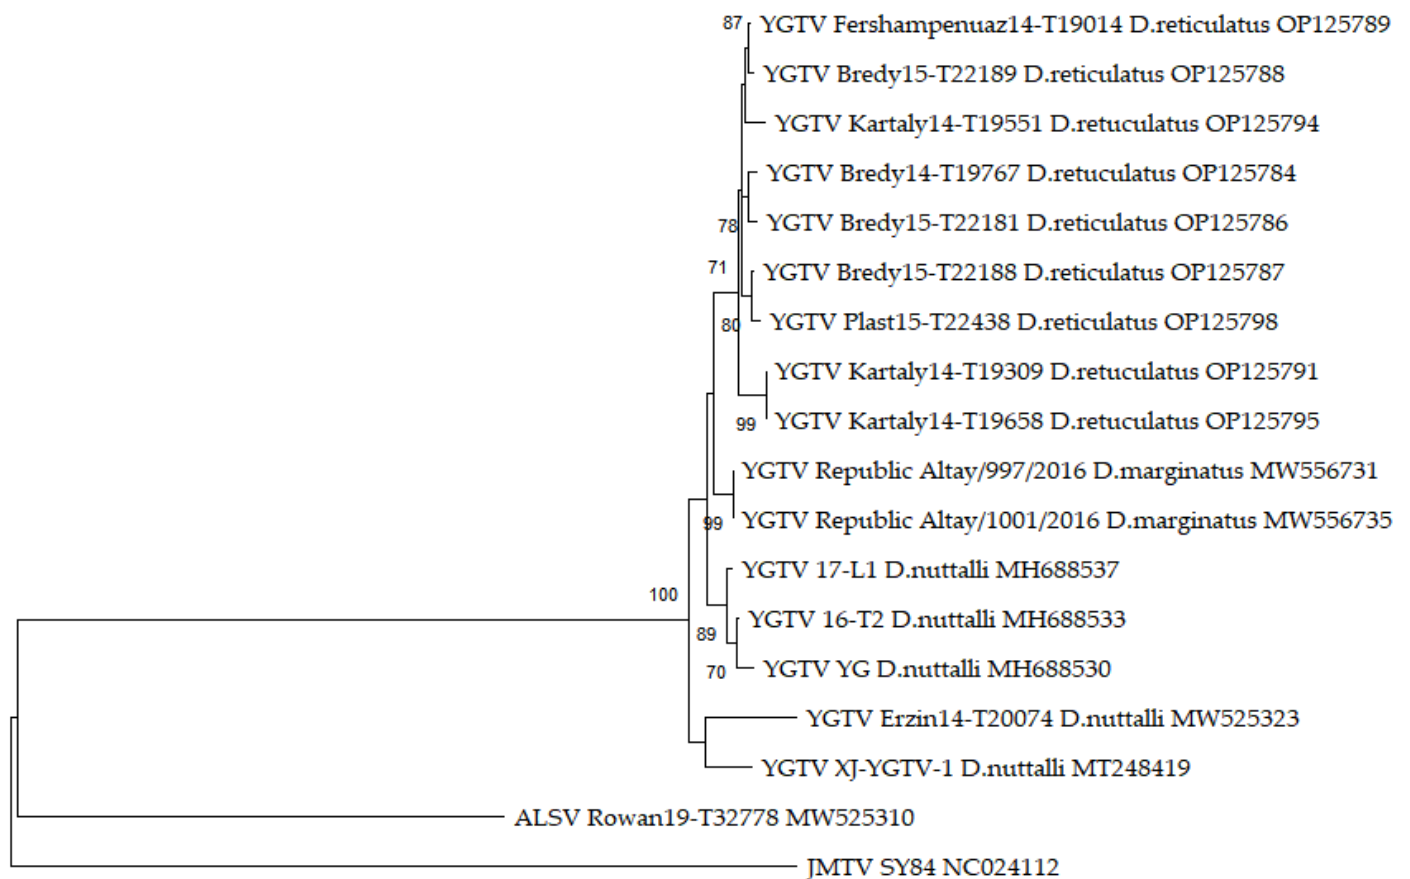

**Figure S3.** Phylogenetic analysis of the complete nucleotide sequence of the Yanggou tick virus VP1b protein. Phylogenetic tree was constructed in MEGA X with the Maximum Likelihood method (1000 bootstrap replications). Bootstrap values (> 70%) are shown at the branches. GenBank accession numbers are listed for each enteries. Yanggou tick virus = YGTV, Alongshan virus = ALSV, Jingmen tick virus = JMTV.



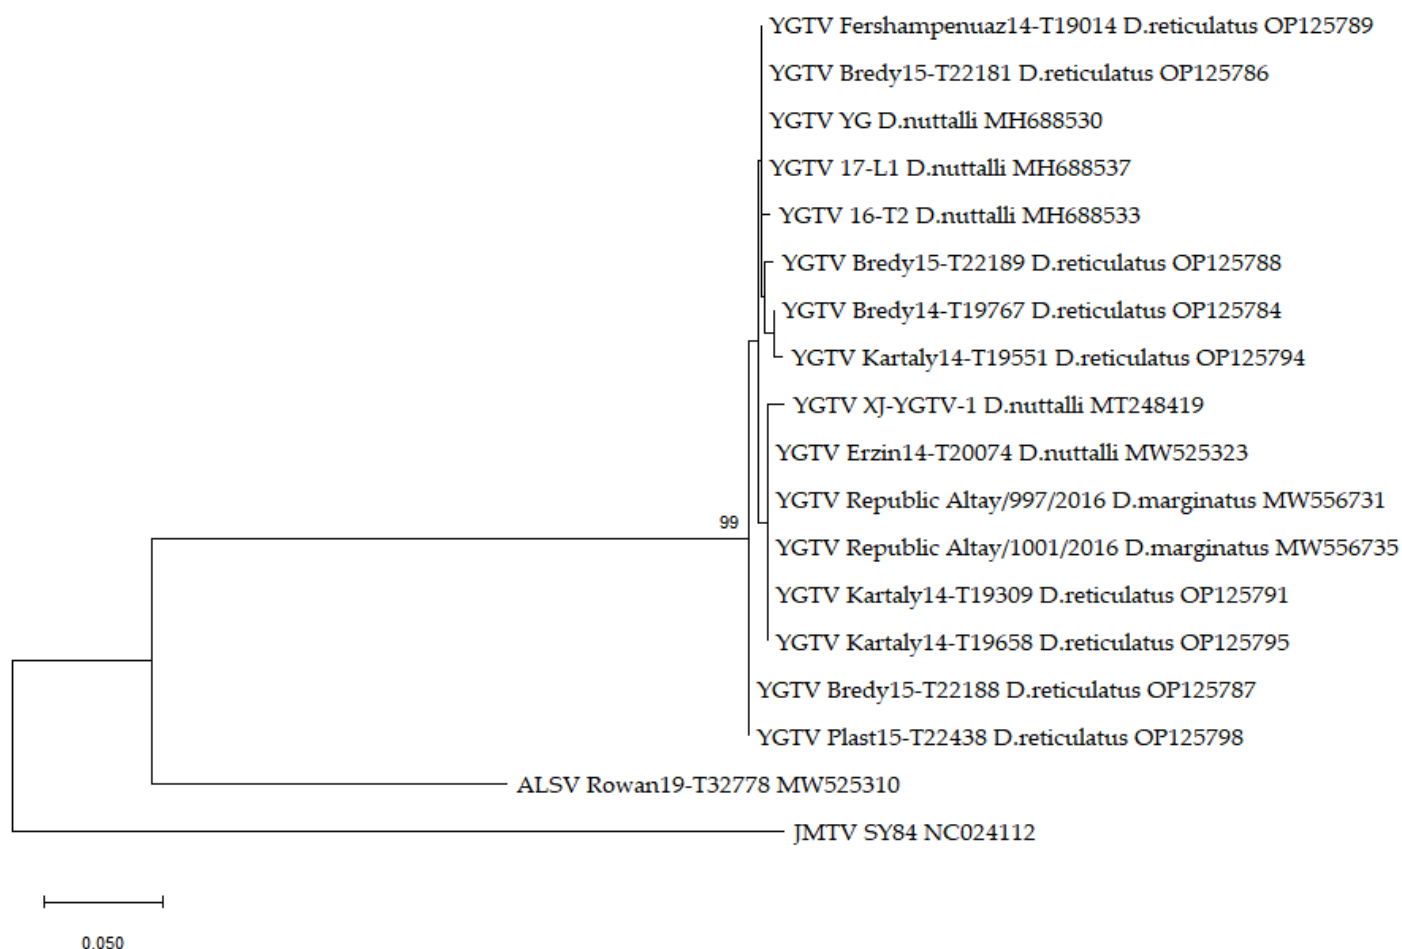

**Figure S4.** Phylogenetic analysis of the complete amino acid sequence of the Yanggou tick virus VP1b protein. Phylogenetic tree was constructed in MEGA X with the Maximum Likelihood method (1000 bootstrap replications). Bootstrap values (> 70%) are shown at the branches. GenBank accession numbers are listed for each entries. Yanggou tick virus = YGTV, Alongshan virus = ALSV, Jingmen tick virus = JMTV.

## References

1. Kholodilov, I.S.; Belova, O.A.; Morozkin, E.S.; Litov, A.G.; Ivannikova, A.Y.; Makenov, M.T.; Shchetinin, A.M.; Aibulatov, S. V.; Bazarova, G.K.; Bell-Sakyi, L.; et al. Geographical and Tick-Dependent Distribution of Flavi-like Alongshan and Yanggou Tick Viruses in Russia. *Viruses* **2021**, *13*, 458, doi:10.3390/v13030458.
2. Kholodilov, I.S.; Litov, A.G.; Klimentov, A.S.; Belova, O.A.; Polienko, A.E.; Nikitin, N.A.; Shchetinin, A.M.; Ivannikova, A.Y.; Bell-Sakyi, L.; Yakovlev, A.S.; et al. Isolation and characterisation of Alongshan virus in Russia. *Viruses* **2020**, *12*, 362, doi:10.3390/v12040362.
3. Romanova, L.I.; Kozlovskaya, L.I.; Shevtsova, A.S.; Karganova, G.G. Evidence for the absence of tick-borne encephalitis virus RNA in bioassays. *Vopr. Virusol.* **2006**, *51*, 38–41.
4. Kholodilov, I.; Belova, O.; Burenkova, L.; Korotkov, Y.; Romanova, L.; Morozova, L.; Kudriavtsev, V.; Gmyl, L.; Belyaletdinova, I.; Chumakov, A.; et al. Ixodid ticks and tick-borne encephalitis virus prevalence in the South Asian part of Russia (Republic of Tuva). *Ticks Tick. Borne. Dis.* **2019**, *10*, 959–969, doi:10.1016/j.ttbdis.2019.04.019.
5. Scaramozzino, N.; Crance, J.-M.; Jouan, A.; DeBriel, D.A.; Stoll, F.; Garin, D. Comparison of Flavivirus

universal primer pairs and development of a rapid, highly sensitive heminested reverse transcription-PCR assay for detection of flaviviruses targeted to a conserved region of the NS5 gene sequences. *J. Clin. Microbiol.* **2001**, 39, 1922–1927, doi:10.1128/JCM.39.5.1922-1927.2001.

6. Klimentov, A.S.; Butenko, A.M.; Khutoretskaya, N. V.; Shustova, E.Y.; Larichev, V.F.; Isaeva, O. V.; Karganova, G.G.; Lukashev, A.N.; Gmyl, A.P. Development of pan-phlebovirus RT-PCR assay. *J. Virol. Methods* **2016**, 232, 29–32, doi:10.1016/j.jviromet.2016.02.009.
7. Tamura, K.; Nei, M.; Kumar, S. Prospects for inferring very large phylogenies by using the neighbor-joining method. *Proc. Natl. Acad. Sci. U. S. A.* **2004**, 101, 11030–11035, doi:10.1073/pnas.0404206101.
8. Kumar, S.; Stecher, G.; Li, M.; Knyaz, C.; Tamura, K. MEGA X: Molecular evolutionary genetics analysis across computing platforms. *Mol. Biol. Evol.* **2018**, 35, 1547–1549, doi:10.1093/molbev/msy096.
9. Zuckerkandl, E.; Pauling, L. Evolutionary divergence and convergence in proteins. In *Evolving Genes and Proteins*; Bryson, V., Vogel, H.J., Eds.; Academic Press: New York and London, 1965; pp. 97–166.
